# Supplementary material
Source: PubMed Central journal article supplement (PMC10015314)
Supplement: jama-e231426-s001.pdf [file jama-e231426-s001.pdf]

## Supplemental Online Content

Nguyen KH, Oh EG, Meyers DJ, et al. Medicare Advantage enrollment among beneficiaries with end-stage renal disease in the first year of the 21st Century Cures Act. *JAMA*. Published March 14, 2023. doi:10.1001/jama.2023.1426

eTable 1. Data Sources and Measure Definitions

eFigure 1. Study Flow Chart: Medicare Beneficiaries With Prevalent Kidney Failure in 2020

eTable 2. Relative Changes in Medicare Advantage Enrollment, Overall and by Race and Ethnicity and Dual Medicare-Medicaid Enrollment Between December 2020 and December 2021

eTable 3. Medicare Beneficiaries With ESRD Overall and by Race, Ethnicity, and Dual Eligibility, 2019-2021

eTable 4. Changes in Composition of Medicare Beneficiaries With End-Stage Renal Disease Between 2020 and 2021

eTable 5. Relative Changes in Medicare Advantage Enrollment Among Medicare Beneficiaries With No Diagnosis of End-Stage Renal Disease

eTable 6. Annual Changes in Medicare Advantage Enrollment, 2019-2021

eFigure 2. Changes in Medicare Advantage Enrollment Among Medicare Beneficiaries With End-Stage Renal Disease, 2020-2021

eFigure 3. Proportion of Medicare Beneficiaries Without End-Stage Renal Disease (ESRD) Enrolled in Medicare Advantage, 2019-2021

eTable 7. Within-Year Changes in Medicare Advantage Enrollment, 2019-2021

eTable 8. Use and Costs of Medicare Beneficiaries With Prevalent End-Stage Renal Disease (ESRD) Based on Changes in Enrollment, 2020

eTable 9. Alternative Specification of Traditional Medicare to Medicare Advantage Switching

eTable 10. Enrollment in Medicare Parts B and D

This supplemental material has been provided by the authors to give readers additional information about their work.

**eTable 1. Data Sources and Measure Definitions**

| <b>Data Source</b>                                     | <b>Characteristics</b>                            | <b>Notes</b>                                                                                                                                                                                                                                                                                                                                                                                                                                                                                                                                                                                                                                                      |
|--------------------------------------------------------|---------------------------------------------------|-------------------------------------------------------------------------------------------------------------------------------------------------------------------------------------------------------------------------------------------------------------------------------------------------------------------------------------------------------------------------------------------------------------------------------------------------------------------------------------------------------------------------------------------------------------------------------------------------------------------------------------------------------------------|
| <b>Medicare Master Beneficiary Summary File (MBSF)</b> | Months of Traditional Medicare Enrollment         |                                                                                                                                                                                                                                                                                                                                                                                                                                                                                                                                                                                                                                                                   |
|                                                        | Age                                               |                                                                                                                                                                                                                                                                                                                                                                                                                                                                                                                                                                                                                                                                   |
|                                                        | Sex                                               |                                                                                                                                                                                                                                                                                                                                                                                                                                                                                                                                                                                                                                                                   |
|                                                        | Race or Ethnicity                                 |                                                                                                                                                                                                                                                                                                                                                                                                                                                                                                                                                                                                                                                                   |
|                                                        | Reason for Current Medicare Entitlement           |                                                                                                                                                                                                                                                                                                                                                                                                                                                                                                                                                                                                                                                                   |
|                                                        | Dual Medicare-Medicaid Coverage                   | Defined as having dual Medicare-Medicaid coverage for at least one month in the year                                                                                                                                                                                                                                                                                                                                                                                                                                                                                                                                                                              |
|                                                        | Part D Cost Sharing Coverage                      |                                                                                                                                                                                                                                                                                                                                                                                                                                                                                                                                                                                                                                                                   |
|                                                        | County-Level Proportion of Female Beneficiaries   |                                                                                                                                                                                                                                                                                                                                                                                                                                                                                                                                                                                                                                                                   |
|                                                        | County-Level Proportion of White Beneficiaries    |                                                                                                                                                                                                                                                                                                                                                                                                                                                                                                                                                                                                                                                                   |
|                                                        | County-Level Proportion of Black Beneficiaries    |                                                                                                                                                                                                                                                                                                                                                                                                                                                                                                                                                                                                                                                                   |
|                                                        | County-Level Proportion of Hispanic Beneficiaries |                                                                                                                                                                                                                                                                                                                                                                                                                                                                                                                                                                                                                                                                   |
|                                                        | County-Level Proportion of Dual Beneficiaries     |                                                                                                                                                                                                                                                                                                                                                                                                                                                                                                                                                                                                                                                                   |
|                                                        | County-Level MA Penetration Rate                  | Defined as county-level proportion of all Medicare beneficiaries enrolled in MA.                                                                                                                                                                                                                                                                                                                                                                                                                                                                                                                                                                                  |
| <b>MBSF Chronic Conditions Segment</b>                 | Number of Chronic Conditions (Ever)               | Chronic conditions (ever) include diagnosis of any of the following: acute myocardial infarction (AMI); arthritis; brain damage; breast cancer, prostate cancer or other cancers; heart failure; chronic kidney disease; chronic obstructive pulmonary disease (COPD); cirrhosis; cystic fibrosis; depression or bipolar disorder; diabetes; drug or alcohol dependence; HIV/AIDS; hip fracture; ischemic heart disease; leukemia; multiple sclerosis; muscular dystrophy; obesity; pressure ulcers; spinal cord injury; and vascular disease. Chronic conditions (2020) includes the previous list and adds Parkinson's disease, urologic cancer, and pneumonia. |
|                                                        | Number of Chronic Conditions (2020)               |                                                                                                                                                                                                                                                                                                                                                                                                                                                                                                                                                                                                                                                                   |
| <b>MBSF Cost and Utilization Segment</b>               | Prescription Drugs (Part B and Part D)            | All costs reflect payments made in 2020 (paid by Medicare, the beneficiary, and other primary payers). Outpatient costs and utilization includes ambulatory surgical centers, dialysis, evaluation and management, hospital outpatient, other carrier, and MD office visits.                                                                                                                                                                                                                                                                                                                                                                                      |
|                                                        | Outpatient Costs                                  |                                                                                                                                                                                                                                                                                                                                                                                                                                                                                                                                                                                                                                                                   |
|                                                        | Dialysis Costs                                    |                                                                                                                                                                                                                                                                                                                                                                                                                                                                                                                                                                                                                                                                   |
|                                                        | Inpatient Hospitalizations                        |                                                                                                                                                                                                                                                                                                                                                                                                                                                                                                                                                                                                                                                                   |
|                                                        | Post-Acute Care                                   |                                                                                                                                                                                                                                                                                                                                                                                                                                                                                                                                                                                                                                                                   |
|                                                        | Hospital Stays                                    |                                                                                                                                                                                                                                                                                                                                                                                                                                                                                                                                                                                                                                                                   |
|                                                        | Skilled Nursing Facility Stays                    |                                                                                                                                                                                                                                                                                                                                                                                                                                                                                                                                                                                                                                                                   |
| <b>CMS Dialysis Facility Compare</b>                   | County-Level Number of Dialysis Facilities        |                                                                                                                                                                                                                                                                                                                                                                                                                                                                                                                                                                                                                                                                   |
| <b>CMS Medicare Advantage (MA) service area file</b>   | Plan Type                                         |                                                                                                                                                                                                                                                                                                                                                                                                                                                                                                                                                                                                                                                                   |
|                                                        | Multi-state                                       |                                                                                                                                                                                                                                                                                                                                                                                                                                                                                                                                                                                                                                                                   |
|                                                        | Parent Organization                               |                                                                                                                                                                                                                                                                                                                                                                                                                                                                                                                                                                                                                                                                   |

|                                      |                                                        |                                                                                                                                                   |
|--------------------------------------|--------------------------------------------------------|---------------------------------------------------------------------------------------------------------------------------------------------------|
| <b>Plan premium information file</b> | Enrollment in MA Contracts with >0% Special Needs Plan |                                                                                                                                                   |
| <b>MA star ratings data table</b>    | Medicare Advantage Star Rating                         |                                                                                                                                                   |
| <b>MA plan directory</b>             | For Profit                                             |                                                                                                                                                   |
|                                      | Contract Age                                           |                                                                                                                                                   |
| <b>System affiliation file</b>       | Integrated system                                      |                                                                                                                                                   |
| <b>Ideon</b>                         | Dialysis Facility Network Breadth in 2020              | Defined as the proportion of dialysis facilities located in each MA contract's service area that were included in that contract's network         |
|                                      | Non-Narrow Dialysis Facility Networks in 2020          | Narrow networks are defined as those that included less than or equal to 25% of available dialysis facilities in a given contract's service area. |

**eFigure 1. Study Flow Chart: Medicare Beneficiaries with Prevalent Kidney Failure in 2020**

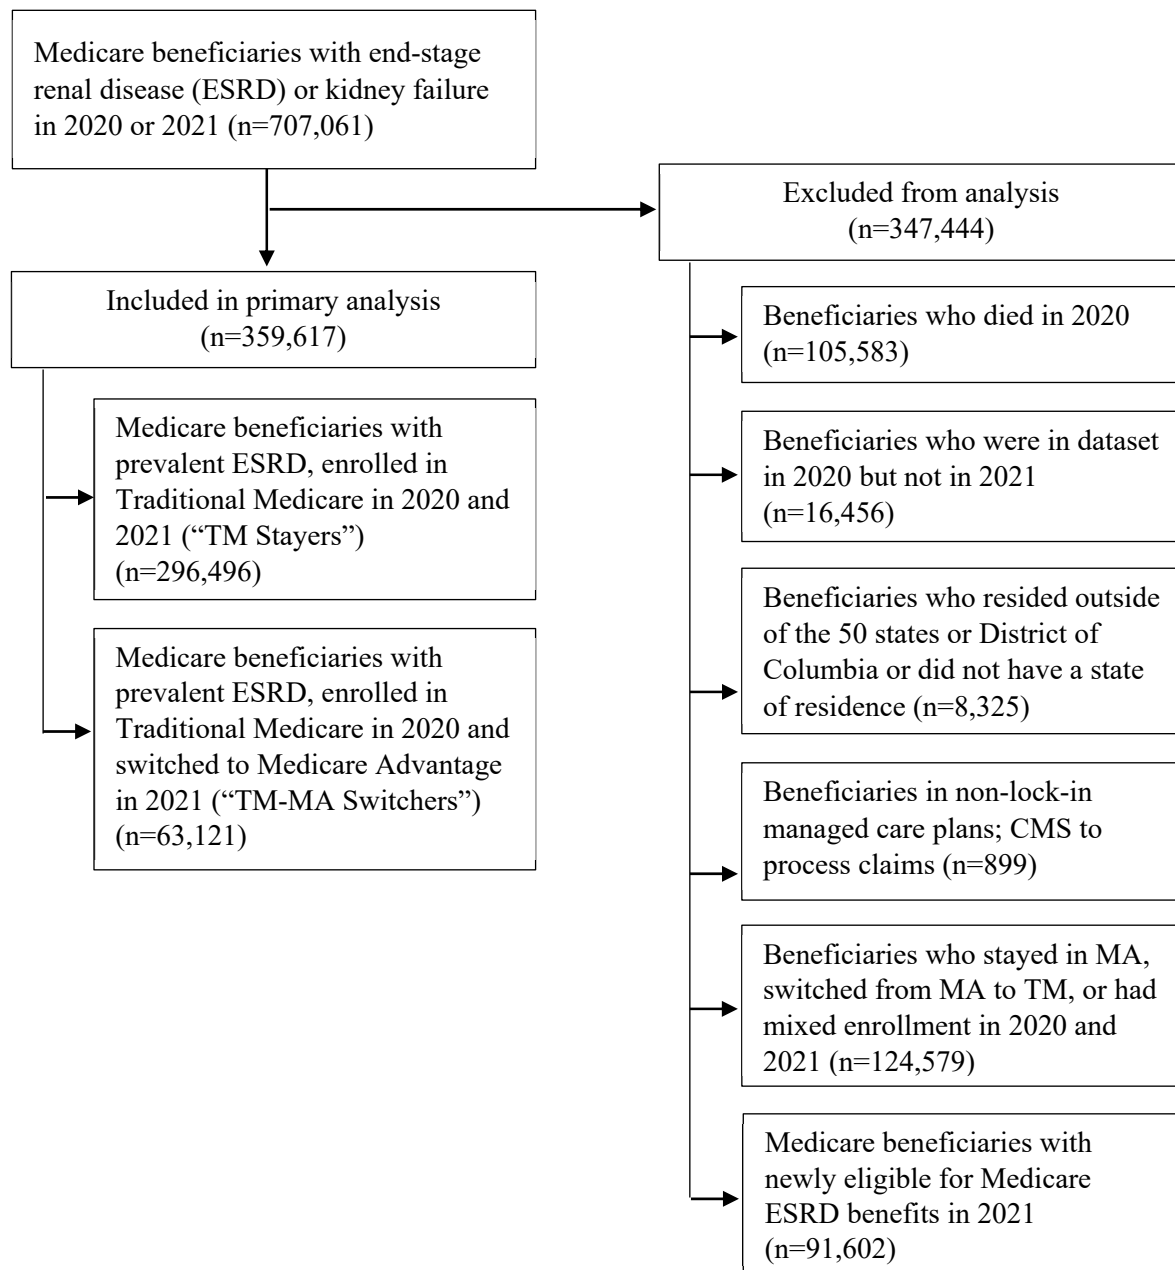

**Notes.** All patients in the study sample have kidney failure per the Centers for Medicare and Medicaid Services' (CMS') criteria, which can include long-term dialysis or kidney transplant recipients. Study flow chart focuses on the main analytic sample, Medicare beneficiaries with prevalent ESRD who were either TM stayers or TM-MA switchers (n= 359,616 individuals). Per guidance from the Research Data Assistance Center, beneficiaries with HMO\_Indicator values '1' (Non lock-in, CMS to process provider claims) were excluded from the analysis due to concerns that not all claims may be observed for these beneficiaries.

**eTable 2. Relative Changes in Medicare Advantage Enrollment, Overall and by Race/Ethnicity and Dual Medicare-Medicaid Enrollment, Between December 2020 and December 2021**

|                                  | Proportion<br>Enrolled in MA<br>in December<br>2020, % | Proportion<br>Enrolled in<br>MA in<br>December<br>2021, % | Absolute<br>Change<br>(Percentage<br>Points) | Relative Change<br>(%) |
|----------------------------------|--------------------------------------------------------|-----------------------------------------------------------|----------------------------------------------|------------------------|
| <b>Overall, %</b>                | 24.8                                                   | 37.4                                                      | 12.6                                         | 50.8%                  |
| <b>Race or Ethnicity, %</b>      |                                                        |                                                           |                                              |                        |
| Non-Hispanic White               | 23.6                                                   | 32.0                                                      | 8.4                                          | 35.5%                  |
| Black                            | 24.8                                                   | 42.9                                                      | 18.1                                         | 72.8%                  |
| Hispanic                         | 28.9                                                   | 41.8                                                      | 13.0                                         | 44.8%                  |
| Asian or Pacific Islander        | 26.4                                                   | 35.3                                                      | 8.8                                          | 33.4%                  |
| American Indian or Alaska Native | 8.2                                                    | 18.9                                                      | 10.7                                         | 130.8%                 |
| Other or Unknown                 | 18.9                                                   | 27.0                                                      | 8.1                                          | 42.9%                  |
| <b>Dual, %</b>                   | 23.9                                                   | 41.5                                                      | 17.6                                         | 73.6%                  |
| <b>Non-Dual, %</b>               | 25.5                                                   | 33.9                                                      | 8.4                                          | 32.9%                  |

**Notes.** Analyses use data from Medicare Master Beneficiary Summary File (MBSF), 2020 and 2021. Race or ethnicity are from the Medicare Beneficiary Summary (MBSF) which relies on an algorithm developed by the Research Triangle Institute (RTI) to classify beneficiaries as Hispanic or Asian/Pacific Islander based on data from the Social Security Administration or if they have a first or last name that RTI determined was likely Hispanic or Asian in origin. Dual-eligibility was defined as having dual Medicare-Medicaid coverage for at least one month in the year. The numerator is the monthly number of all Medicare beneficiaries with end-stage renal disease (ESRD) enrolled in a Medicare Advantage (MA) plan. The denominator is monthly number of all Medicare beneficiaries with ESRD. For estimates stratified by race/ethnicity, the numerator is the race/ethnicity-specific monthly number of all Medicare beneficiaries with ESRD enrolled in an MA plan and denominator is monthly number of all Medicare beneficiaries with ESRD from each racial/ethnic group. For estimates stratified by dual Medicare-Medicaid coverage, the numerator is the monthly number of all Medicare beneficiaries with ESRD enrolled in an MA plan who had dual Medicare-Medicaid coverage for at least one month in a calendar year and the denominator is monthly number of all Medicare beneficiaries with ESRD with dual Medicare-Medicaid coverage for at least one month in a calendar year.

**eTable 3. Medicare Beneficiaries with ESRD Overall and by Race, Ethnicity, and Dual Eligibility, 2019-2021**

| Month  | Overall | American Indian/<br>Alaska Native | Asian or Pacific Islander | Black   | Hispanic | White   | Non-Dual | Dual    |
|--------|---------|-----------------------------------|---------------------------|---------|----------|---------|----------|---------|
| Jan-19 | 390,734 | 5,051                             | 20,621                    | 141,017 | 69,496   | 144,162 | 212,097  | 178,637 |
| Feb-19 | 392,861 | 5,078                             | 20,738                    | 141,748 | 69,943   | 144,854 | 213,144  | 179,717 |
| Mar-19 | 395,148 | 5,102                             | 20,857                    | 142,509 | 70,410   | 145,640 | 214,273  | 180,875 |
| Apr-19 | 397,561 | 5,133                             | 20,979                    | 143,308 | 70,948   | 146,446 | 215,463  | 182,098 |
| May-19 | 399,753 | 5,155                             | 21,108                    | 144,068 | 71,373   | 147,181 | 216,561  | 183,192 |
| Jun-19 | 402,152 | 5,176                             | 21,209                    | 144,910 | 71,903   | 147,958 | 217,820  | 184,332 |
| Jul-19 | 404,409 | 5,202                             | 21,331                    | 145,651 | 72,364   | 148,699 | 219,075  | 185,334 |
| Aug-19 | 406,595 | 5,229                             | 21,443                    | 146,382 | 72,805   | 149,445 | 220,213  | 186,382 |
| Sep-19 | 408,732 | 5,252                             | 21,522                    | 147,084 | 73,286   | 150,148 | 221,411  | 187,321 |
| Oct-19 | 410,758 | 5,259                             | 21,608                    | 147,730 | 73,741   | 150,843 | 222,585  | 188,173 |
| Nov-19 | 412,844 | 5,270                             | 21,697                    | 148,400 | 74,169   | 151,578 | 223,818  | 189,026 |
| Dec-19 | 414,725 | 5,285                             | 21,781                    | 149,027 | 74,544   | 152,240 | 224,997  | 189,728 |
| Jan-20 | 472,234 | 5,903                             | 24,460                    | 164,606 | 81,904   | 182,524 | 258,464  | 213,770 |
| Feb-20 | 474,575 | 5,921                             | 24,577                    | 165,383 | 82,387   | 183,322 | 259,627  | 214,948 |
| Mar-20 | 477,062 | 5,949                             | 24,710                    | 166,187 | 82,926   | 184,152 | 260,924  | 216,138 |
| Apr-20 | 479,454 | 5,972                             | 24,821                    | 167,002 | 83,482   | 184,903 | 262,059  | 217,395 |
| May-20 | 481,729 | 5,997                             | 24,941                    | 167,758 | 83,957   | 185,683 | 263,186  | 218,543 |
| Jun-20 | 484,082 | 6,021                             | 25,047                    | 168,551 | 84,422   | 186,524 | 264,400  | 219,682 |
| Jul-20 | 486,119 | 6,036                             | 25,130                    | 169,265 | 84,800   | 187,231 | 265,467  | 220,652 |
| Aug-20 | 488,283 | 6,053                             | 25,227                    | 170,015 | 85,275   | 187,926 | 266,585  | 221,698 |
| Sep-20 | 490,664 | 6,066                             | 25,336                    | 170,816 | 85,734   | 188,767 | 267,916  | 222,748 |
| Oct-20 | 492,770 | 6,076                             | 25,439                    | 171,550 | 86,187   | 189,446 | 269,056  | 223,714 |
| Nov-20 | 494,680 | 6,100                             | 25,535                    | 172,129 | 86,578   | 190,135 | 270,158  | 224,522 |
| Dec-20 | 496,551 | 6,117                             | 25,598                    | 172,766 | 86,974   | 190,760 | 271,246  | 225,305 |
| Jan-21 | 556,266 | 6,701                             | 28,093                    | 187,715 | 94,601   | 223,444 | 302,679  | 253,587 |
| Feb-21 | 546,456 | 6,530                             | 27,627                    | 185,112 | 92,834   | 218,731 | 297,258  | 249,198 |
| Mar-21 | 539,525 | 6,412                             | 27,326                    | 183,288 | 91,761   | 215,106 | 293,327  | 246,198 |
| Apr-21 | 533,265 | 6,327                             | 27,076                    | 181,592 | 90,910   | 211,746 | 289,681  | 243,584 |
| May-21 | 527,326 | 6,251                             | 26,885                    | 179,911 | 90,190   | 208,501 | 286,293  | 241,033 |
| Jun-21 | 521,536 | 6,175                             | 26,597                    | 178,420 | 89,521   | 205,241 | 282,975  | 238,561 |
| Jul-21 | 515,964 | 6,104                             | 26,392                    | 176,971 | 88,873   | 202,073 | 279,728  | 236,236 |
| Aug-21 | 509,684 | 6,017                             | 26,135                    | 175,162 | 88,095   | 198,740 | 276,187  | 233,497 |
| Sep-21 | 502,248 | 5,925                             | 25,807                    | 172,974 | 87,072   | 195,002 | 272,157  | 230,091 |
| Oct-21 | 494,500 | 5,810                             | 25,495                    | 170,738 | 86,074   | 191,015 | 267,961  | 226,539 |
| Nov-21 | 486,868 | 5,703                             | 25,167                    | 168,711 | 85,119   | 186,920 | 263,779  | 223,089 |
| Dec-21 | 479,131 | 5,607                             | 24,871                    | 166,664 | 84,033   | 182,839 | 259,554  | 219,577 |

**eTable 4. Annual Changes in Medicare Advantage Enrollment, 2019-2021**

|                                        | Change in MA Enrollment from December 2019 to December 2020 (95% CI) | Change in MA Enrollment from December 2020 to December 2021 (95% CI) | Difference in enrollment growth in 2021 compared to 2020 |
|----------------------------------------|----------------------------------------------------------------------|----------------------------------------------------------------------|----------------------------------------------------------|
| <b>Overall</b>                         | 2.8 (2.7, 3.0)***                                                    | 12.6 (12.4, 12.9)***                                                 | 9.8                                                      |
| <b>Stratified by Race or Ethnicity</b> |                                                                      |                                                                      |                                                          |
| American Indian or Alaska Native       | 1.6 (0.6, 2.5)**                                                     | 10.7 (9.5, 12.0)***                                                  | 9.1                                                      |
| Asian or Pacific Islander              | 2.8 (2.0, 3.6)***                                                    | 8.8 (8.0, 9.6)***                                                    | 6.0                                                      |
| Black or African American              | 3.1 (2.8, 3.4)***                                                    | 18.1 (17.8, 18.4)***                                                 | 15.0                                                     |
| Hispanic                               | 2.9 (2.4, 3.3)***                                                    | 13.0 (12.5, 13.4)***                                                 | 10.1                                                     |
| White                                  | 2.8 (2.6, 3.1)***                                                    | 8.4 (8.1, 8.7)***                                                    | 5.6                                                      |
| <b>Non-Dual</b>                        | 2.3 (2.1, 2.6)***                                                    | 8.4 (8.2, 8.6)***                                                    | 6.1                                                      |
| <b>Dual</b>                            | 3.5 (3.2, 3.7)***                                                    | 17.6 (17.3, 17.8)***                                                 | 14.1                                                     |

**Notes.** \*p<0.05, \*\*p<0.01, \*\*\*p<0.001. Changes measured in percentage point terms. Difference in enrollment growth in 2021 compared to 2020 subtracts “Change in MA enrolment from December 2019 to December 2020” from “Change in MA enrollment from December 2020 to December 2021”

**eTable 5. Within-Year Changes in Medicare Advantage Enrollment, 2019-2021**

|                                        | Change in MA Enrollment from January 2019 to December 2019 (95% CI) | Change in MA Enrollment from January 2020 to December 2020 (95% CI) | Change in MA Enrollment from January 2021 to December 2021 (95% CI) |
|----------------------------------------|---------------------------------------------------------------------|---------------------------------------------------------------------|---------------------------------------------------------------------|
| <b>Overall</b>                         | -0.6 (-0.8, -0.4)***                                                | -0.3 (-0.5, -0.1)***                                                | 3.3 (3.1, 3.5)***                                                   |
| <b>Stratified by Race or Ethnicity</b> |                                                                     |                                                                     |                                                                     |
| American Indian or Alaska Native       | -0.1 (-1.1, 0.8)                                                    | 0.2 (-0.8, 1.2)                                                     | 4.5 (3.2, 5.8)***                                                   |
| Asian or Pacific Islander              | -0.2 (-1.0, 0.6)                                                    | 0.1 (-0.6, 0.9)                                                     | 2.3 (1.5, 3.1)***                                                   |
| Black or African American              | -0.5 (-0.8, -0.2)***                                                | -0.2 (-0.5, 0.1)                                                    | 5.1 (4.7, 5.4)***                                                   |
| Hispanic                               | -0.3 (-0.8, 0.1)                                                    | -0.3 (-0.8, 0.1)                                                    | 3.4 (2.9, 3.8)***                                                   |
| White                                  | -0.7 (-1.0, -0.4)***                                                | -0.5 (-0.7, -0.2)**                                                 | 1.5 (1.2, 1.8)***                                                   |
| <b>Non-Dual</b>                        | -0.9 (-1.1, -0.6)***                                                | -0.7 (-1.0, -0.5)***                                                | 0.6 (0.4, 0.9)***                                                   |
| <b>Dual</b>                            | -0.2 (-0.4, 0.1)                                                    | 0.2 (-0.0, 0.4)                                                     | 6.4 (6.1, 6.6)***                                                   |

Notes. \*p<0.05, \*\*p<0.01, \*\*\*p<0.001. Changes measured in percentage point terms.

**eTable 6. Changes in Composition of Medicare Beneficiaries with End-Stage Renal Disease Between 2020 and 2021**

|                                                   | <b>2020<br/>(n=604,757)</b> | <b>2021<br/>(n=575,804)</b> | <b>Unadjusted Difference (95% CI)</b> |
|---------------------------------------------------|-----------------------------|-----------------------------|---------------------------------------|
| <b>Age, Mean (SD)</b>                             | 64.38 (14.32)               | 64.72 (14.18)               | 0.34 (0.29, 0.40)***                  |
| <b>Sex, %</b>                                     |                             |                             |                                       |
| Male                                              | 57.9                        | 57.8                        | -0.08 (-0.3, 0.1)                     |
| Female                                            | 42.1                        | 42.2                        | 0.08 (-0.1, 0.3)                      |
| <b>Race or Ethnicity%</b>                         |                             |                             |                                       |
| Non-Hispanic White                                | 47.3                        | 46.9                        | -0.38 (-0.56, -0.20)***               |
| Black                                             | 34.0                        | 34.0                        | -0.01 (-0.18, 0.16)                   |
| Hispanic                                          | 7.9                         | 7.7                         | -0.19 (-2.84, -0.09)***               |
| Asian or Pacific Islander                         | 4.2                         | 4.1                         | -0.02 (-0.09, 0.05)                   |
| American Indian or Alaska Native                  | 1.3                         | 1.2                         | -0.08 (-0.12, -0.04)***               |
| Other Race                                        | 3.0                         | 3.5                         | 0.48 (0.42, 0.55)****                 |
| Unknown Race                                      | 2.3                         | 2.5                         | 0.19 (0.14, 0.25)****                 |
| <b>Reason for Current Medicare Entitlement, %</b> |                             |                             |                                       |
| Old Age and Survivors Insurance                   | 54.5                        | 55.7                        | 1.19 (1.01, 1.37)***                  |
| Disability Insurance Benefits                     | 25.1                        | 25.7                        | 0.59 (0.43, 0.75)***                  |
| End-Stage Renal Disease (ESRD)                    | 16.8                        | 15.5                        | -1.25 (-1.39, -1.12)***               |
| Both Disability Insurance Benefits and ESRD       | 3.7                         | 3.1                         | -0.53 (-0.59, -0.46)***               |
| <b>Dual Medicare-Medicaid Coverage, %</b>         |                             |                             |                                       |
| Never Dual                                        | 54.6                        | 54.3                        | -0.25 (-0.43, -0.07)*                 |
| Dual 1-11 Months                                  | 13.4                        | 11.4                        | -1.93 (-2.03, -1.81)***               |
| Dual 12 Months                                    | 32.1                        | 34.2                        | 2.18 (2.01, 2.35)***                  |
| <b>Part D Coverage</b>                            |                             |                             |                                       |
| No Part D Coverage                                | 19.5                        | 17.4                        | -2.13 (-2.27, -1.99)***               |
| Part D Coverage 1-11 Months                       | 18.5                        | 19.5                        | 0.98 (0.84, 1.12)***                  |
| Part D Coverage 12 Months                         | 62.0                        | 63.1                        | 1.15 (0.97, 1.32)***                  |
| <b>Medicare Coverage Type</b>                     |                             |                             |                                       |
| Traditional Medicare all year                     | 74.0                        | 61.2                        | -12.80 (-12.97, -12.63)***            |
| Medicare Advantage all year                       | 19.4                        | 25.9                        | 6.56 (6.41, 6.71)***                  |
| Mixed coverage                                    | 6.6                         | 12.8                        | 6.24 (6.13, 6.34)***                  |

**Notes.** \*p<0.05, \*\*p<0.01, \*\*\*p<0.001. Samples include individuals who died in 2020 or 2021. Analyses use data from Medicare Master Beneficiary Summary File (MBSF), 2020 and 2021. Race or ethnicity are from the Medicare Beneficiary Summary (MBSF) which relies on an algorithm developed by the Research Triangle Institute (RTI) to classify beneficiaries as Hispanic or Asian/Pacific Islander based on data from the Social Security Administration or if they have a first or last name that RTI determined was likely Hispanic or Asian in origin.

**eFigure 2. Changes in Medicare Advantage Enrollment Among Medicare Beneficiaries with End-Stage Renal Disease, 2020-21**

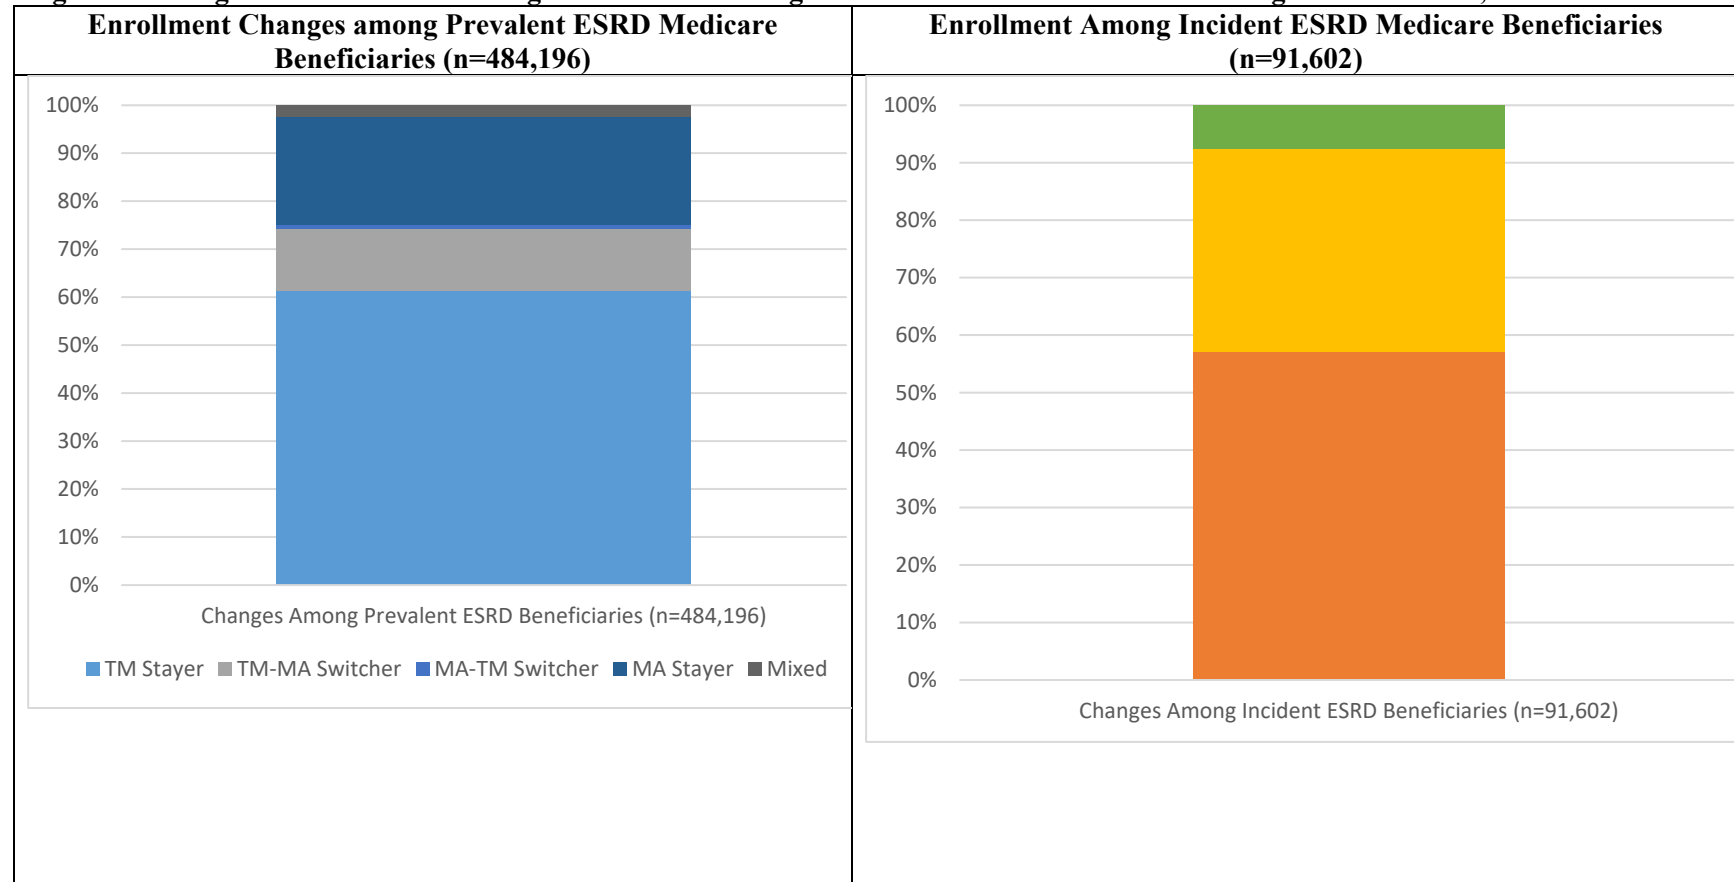

**Notes.** Analyses use data from Medicare Master Beneficiary Summary File (MBSF), 2020 and 2021. TM stayer refers to being only enrolled in TM in 2020 and 2021. TM-MA switching refers to being enrolled only in TM in 2020 and in MA in 2021. MA-TM switching refers to being enrolled in MA for at least one month in 2020 and only in TM in 2021. MA stayer refers to being only enrolled in MA in 2020 and 2021. Mixed refers to having both TM and MA in 2020 and 2021. Among beneficiaries with incident ESRD in 2021, Incident TM refers to only having TM in 2021, Incident MA refers to only having MA in 2021, and Incident Mixed refers to having both TM and MA in 2021.

**eFigure 3. Proportion of Medicare Beneficiaries without End Stage Renal Disease (ESRD) Enrolled in Medicare Advantage, 2019-21**

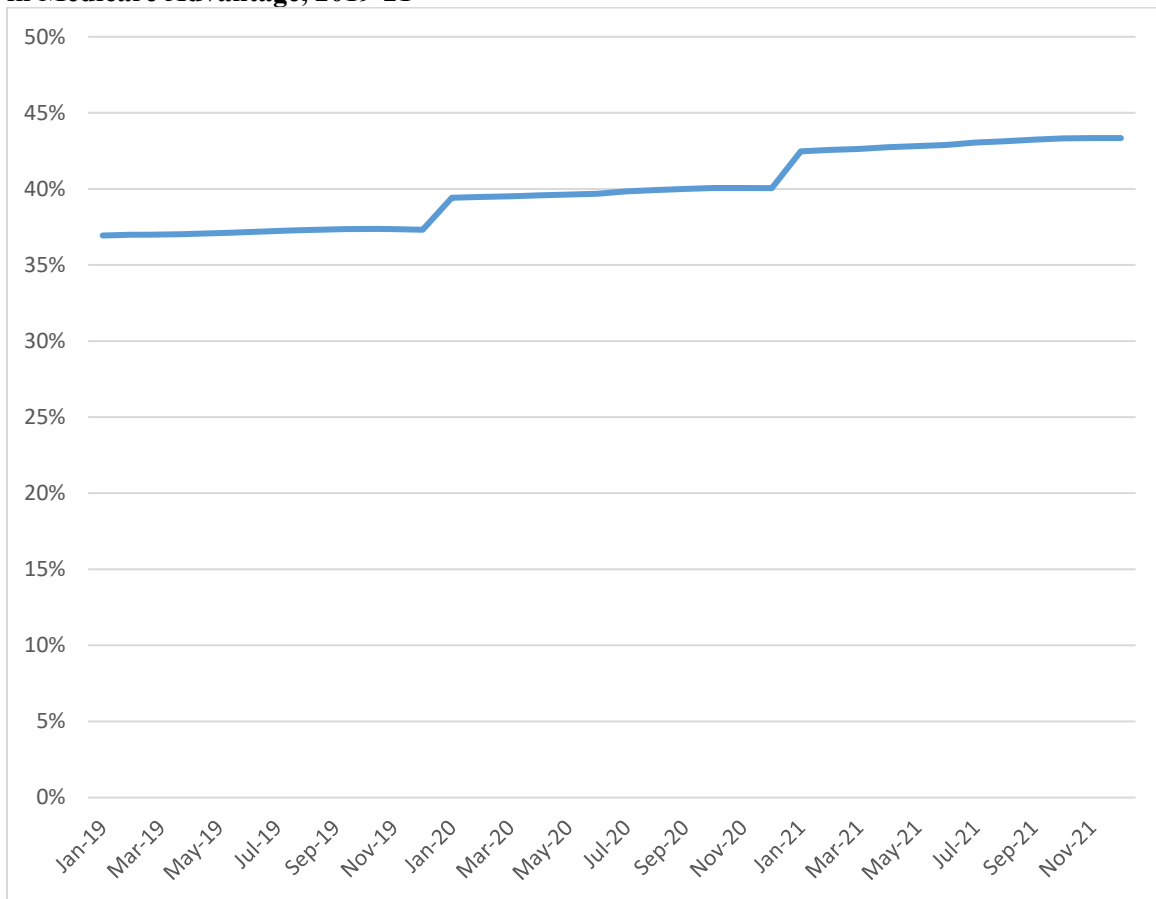

**Notes.** Analyses use data from Medicare Master Beneficiary Summary File (MBSF). The numerator is the monthly number of all Medicare beneficiaries without end-stage renal disease (ESRD) enrolled in a Medicare Advantage (MA) plan. The denominator is monthly number of all Medicare beneficiaries without ESRD.

**eTable 7. Relative Changes in Medicare Advantage Enrollment Among Medicare Beneficiaries With No Diagnosis of End-Stage Renal Disease**

|                   | <b>Proportion<br/>Enrolled in MA<br/>in December<br/>2020, %</b> | <b>Proportion<br/>Enrolled in<br/>MA in<br/>December<br/>2021, %</b> | <b>Absolute<br/>Change<br/>(Percentage<br/>Points)</b> | <b>Relative Change<br/>(%)</b> |
|-------------------|------------------------------------------------------------------|----------------------------------------------------------------------|--------------------------------------------------------|--------------------------------|
| <b>Overall, %</b> | 40.1                                                             | 43.3                                                                 | 3.3                                                    | 8.2%                           |

**Notes.** Analyses use data from Medicare Master Beneficiary Summary File (MBSF). The numerator is the monthly number of all Medicare beneficiaries without end-stage renal disease (ESRD) enrolled in a Medicare Advantage (MA) plan. The denominator is monthly number of all Medicare beneficiaries without ESRD.

**eTable 8. Utilization and Costs of Medicare Beneficiaries with Prevalent End-Stage Renal Disease (ESRD) Based on Changes in Enrollment, 2020**

|                                                         | <b>TM Stayer<br/>(n=296,496)</b> | <b>TM-MA<br/>Switcher<br/>(n=63,121)</b> | <b>p-<br/>value</b> |
|---------------------------------------------------------|----------------------------------|------------------------------------------|---------------------|
| <b>Annual Events in 2020 (n),<br/>Mean(SD)</b>          |                                  |                                          |                     |
| Ambulatory surgical center                              | 0.3 (1.1)                        | 0.4 (1.2)                                | <0.001              |
| Dialysis                                                | 11.7 (9.1)                       | 12.5 (8.0)                               | <0.001              |
| Evaluation and management                               | 28.1 (53.2)                      | 27.0 (47.4)                              | <0.001              |
| Other Part B carrier                                    | 13.5 (67.9)                      | 12.7 (64.3)                              | 0.008               |
| MD office (E&M) Part B                                  | 9.2 (8.7)                        | 8.4 (8.0)                                | <0.001              |
| Acute inpatient stays                                   | 1.1 (1.8)                        | 1.3 (2.0)                                | <0.001              |
| Hospital outpatient stays                               | 1.3 (2.7)                        | 1.7 (4.0)                                | <0.001              |
| Part B Drug                                             | 6.1 (14.2)                       | 4.5 (11.2)                               | <0.001              |
| Part D Drug                                             | 51.6 (42.8)                      | 48.6 (40.2)                              | <0.001              |
| Skilled nursing facility stays<br>per 100 beneficiaries | 17.9 (62.9)                      | 13.4 (52.7)                              | <0.001              |
| 30-day hospital readmissions                            | 0.3 (1.1)                        | 0.4 (1.2)                                | <0.001              |
| Home health visits                                      | 7.8 (24.3)                       | 7.8 (24.1)                               | 0.45                |
| <b>Payments in 2020 (\$),<br/>Mean(SD)</b>              |                                  |                                          |                     |
| <i>Acute Inpatient Care</i>                             |                                  |                                          |                     |
| Medicare                                                | 19,829 (37,471)                  | 20,355 (35,974)                          | 0.001               |
| Beneficiary                                             | 1,037 (2,193)                    | 1,113 (2,213)                            | <0.001              |
| Other Primary Payer                                     | 1,150 (13,877)                   | 612 (9,390)                              | <0.001              |
| <i>Ambulatory Surgery Center</i>                        |                                  |                                          |                     |
| Medicare                                                | 452 (1,885)                      | 595 (2235)                               | <0.001              |
| Beneficiary                                             | 115 (479)                        | 152 (569)                                | <0.001              |
| Other Primary Payer                                     | 6 (193)                          | 5 (157)                                  | 0.083               |
| <i>Dialysis</i>                                         |                                  |                                          |                     |
| Medicare                                                | 2,064 (1,094)                    | 2,234 (933)                              | <0.001              |
| Beneficiary                                             | 550 (291)                        | 596 (251)                                | <0.001              |
| Other Primary Payer                                     | 22 (252)                         | 13 (163)                                 | <0.001              |
| <i>Evaluation and Management<br/>(E&amp;M)</i>          |                                  |                                          |                     |
| Medicare                                                | 2,402 (4,469)                    | 2,316 (3,982)                            | <0.001              |
| Beneficiary                                             | 596 (1,099)                      | 575 (980)                                | <0.001              |
| Other Primary Payer                                     | 23 (397)                         | 14 (212)                                 | <0.001              |
| <i>Home Health</i>                                      |                                  |                                          |                     |
| Medicare                                                | 1,665 (4,177)                    | 1,674 (4,075)                            | 0.611               |
| Other Primary Payer                                     | 2 (67)                           | 1 (55)                                   | 0.066               |
| <i>Hospital Outpatient</i>                              |                                  |                                          |                     |
| Medicare                                                | 32,226 (20,821)                  | 34,039 (18,090)                          | <0.001              |

|                                                |                |                 |        |
|------------------------------------------------|----------------|-----------------|--------|
| Beneficiary                                    | 7,945 (4,598)  | 8,410 (3,945)   | <0.001 |
| Other Primary Payer                            | 343 (3,657)    | 208 (3,767)     | <0.001 |
| <i>Other Inpatient</i>                         |                |                 |        |
| Medicare                                       | 1,945 (10,865) | 1,827 (9,619)   | 0.012  |
| Beneficiary                                    | 91 (1,362)     | 75 (1,127)      | 0.006  |
| Other Primary Payer                            | 49 (2,927)     | 22 (1,587)      | 0.024  |
| <i>Other Part B Carrier</i>                    |                |                 |        |
| Medicare                                       | 1,445 (6,716)  | 1,367 (6,274)   | 0.008  |
| Beneficiary                                    | 366 (1,701)    | 347 (1,590)     | 0.012  |
| Other Primary Payer                            | 6 (345)        | 4 (179)         | 0.377  |
| <i>MD Office (E&amp;M) Part B</i>              |                |                 |        |
| Medicare                                       | 650 (654)      | 581 (574)       | <0.001 |
| Beneficiary                                    | 203 (190)      | 180 (169)       | <0.001 |
| Other Primary Payer                            | 19 (158)       | 9 (102)         | <0.001 |
| <i>Part B Drug</i>                             |                |                 |        |
| Medicare                                       | 1,197 (9,706)  | 808 (7,756)     | <0.001 |
| Beneficiary                                    | 306 (2,446)    | 205 (1,929)     | <0.001 |
| Other Primary Payer                            | 23 (970)       | 6 (224)         | <0.001 |
| <i>Part D</i>                                  |                |                 |        |
| Medicare                                       | 8,788 (20,031) | 9,742 (18,714)  | <0.001 |
| Beneficiary                                    | 571 (1,790)    | 263 (879)       | <0.001 |
| <i>Part D Total (Gross) Prescription Costs</i> | 9,660 (20,570) | 10,095 (18,838) | <0.001 |
| <i>Skilled Nursing Facility</i>                |                |                 |        |
| Medicare                                       | 2,677 (10,345) | 1,850 (7,962)   | <0.001 |
| Beneficiary                                    | 542 (2,440)    | 370 (1,957)     | <0.001 |
| Other Primary Payer                            | 5 (285)        | 4 (284)         | 0.471  |

**Notes.** TM = Traditional Medicare; MA = Medicare Advantage; E&M = Evaluation and Management. Sample is limited to individuals who had only Traditional Medicare in 2020. TM Stayer indicates a beneficiary was enrolled only in TM in 2020 and 2021. TM-MA switcher indicates a beneficiary was enrolled only in TM in 2020 and only in MA in 2021. Analyses use data from Medicare Master Beneficiary Summary File (MBSF) and Costs and Use segment. “Other Primary Payer” could include Veterans Affairs or TRICARE paid for services on behalf of the beneficiary. “Evaluation and Management” can include hospital, emergency room, home or nursing home visit, specialist, or consultation visits. Statistical differences across two groups using t-tests. Estimates are standardized and weighted by months enrolled in Medicare Part A (inpatient care, skilled nursing facilities, and home health), Medicare Part B (ambulatory surgical center, dialysis, E&M, hospital outpatient, other Part B carrier, MD office, and Part B drugs), and Part D (Part D prescription drug costs)

**eTable 9. Alternative Specification of Traditional Medicare to Medicare Advantage Switching**

|                                                           | <b>TM Stayer</b><br>(n=296,525) | <b>TM-MA Switcher</b><br>(n=63,159) |
|-----------------------------------------------------------|---------------------------------|-------------------------------------|
| <b>Beneficiary Characteristics</b>                        |                                 |                                     |
| <b>Age, Mean (SD)</b>                                     | 62.1 (14.9)                     | 58.6 (12.4)                         |
| <b>Sex, %</b>                                             |                                 |                                     |
| Male                                                      | 59.2                            | 57.5                                |
| Female                                                    | 40.8                            | 42.5                                |
| <b>Race or Ethnicity%</b>                                 |                                 |                                     |
| White                                                     | 47.9                            | 31.0                                |
| Black                                                     | 31.8                            | 51.0                                |
| Hispanic                                                  | 8.1                             | 9.2                                 |
| Asian or Pacific Islander                                 | 4.5                             | 3.1                                 |
| American Indian or Alaska Native                          | 1.7                             | 1.0                                 |
| Other or Unknown                                          | 6.1                             | 4.7                                 |
| <b>Reason for Current Medicare Entitlement, %</b>         |                                 |                                     |
| Old Age and Survivors Insurance                           | 47.9                            | 32.3                                |
| Disability Insurance Benefits                             | 25.8                            | 38.6                                |
| End-Stage Renal Disease (ESRD)                            | 22.6                            | 23.3                                |
| Both Disability Insurance Benefits and ESRD               | 3.6                             | 5.9                                 |
| <b>≥1 Month Dual Medicare-Medicaid Coverage, %</b>        | 42.2                            | 63.0                                |
| <b>≥1 Month Part D Coverage, %</b>                        | 71.4                            | 83.9                                |
| <b>≥1 Month Eligible for Part D Low-Income Subsidy, %</b> | 46.0                            | 69.5                                |
| <b>County-Level Characteristics</b>                       |                                 |                                     |
| <b>MA Penetration Rate in 2021 (%), Mean(SD)</b>          | 43.6 (13.5)                     | 46.4 (11.5)                         |
| <b>Number of Dialysis Facilities in 2020, Median(IQR)</b> | 11 (3-30)                       | 11 (3-31)                           |
| Number of DaVita-Owned Facilities in 2020, Median(IQR)    | 4 (1-12)                        | 4 (1-12)                            |
| Number of Fresenius-Owned Facilities in 2020, Median(IQR) | 3 (1-8)                         | 4 (1-9)                             |
| <b>Proportion of Female Beneficiaries (%), Mean(SD)</b>   | 54.5 (1.5)                      | 54.7 (1.5)                          |
| <b>Proportion of White Beneficiaries (%), Mean(SD)</b>    | 68.0 (20.7)                     | 64.7 (20.5)                         |
| <b>Proportion of Black Beneficiaries (%), Mean(SD)</b>    | 14.4 (15.2)                     | 18.4 (16.4)                         |
| <b>Proportion of Hispanic Beneficiaries (%), Mean(SD)</b> | 10.0 (15.2)                     | 10.4 (15.6)                         |
| <b>Proportion of Dual Beneficiaries (%), Mean (SD)</b>    | 20.9 (8.7)                      | 21.9 (8.9)                          |

**Notes.** TM = Traditional Medicare; MA = Medicare Advantage; HMO = Health Maintenance Organization; POS = Point of Service; PPO = Preferred Provider Organization; MSA = Medical Savings Account; PACE = Program of All-inclusive Care for the Elderly; PFFS = Private Fee-for-Service. TM Stayer indicates a beneficiary was enrolled only in TM in 2020 and 2021. TM-MA switcher indicates a beneficiary was enrolled only in TM in 2020 and only in MA in 2021 or who switched from MA to TM in 2020 and were continuously enrolled in 2021.  $p < 0.001$  for all comparisons using Pearson's chi-square tests (categorical variables) or t-tests (continuous variables). Analyses use data from Medicare Master Beneficiary Summary File (MBSF). MA penetration rate is defined as the county-level proportion of all Medicare beneficiaries enrolled in MA. Dual-eligibility was defined as having dual Medicare-Medicaid coverage for at least one month in the year. Dialysis facility network breadth is defined as the proportion of dialysis facilities located in each MA contract's service area that were included in that contract's

network. Narrow networks are defined as those that included less than or equal to 25% of available dialysis facilities in a given contract's service area.

**eTable 10. Enrollment in Medicare Parts B and D**

|                                  | <b>TM Stayer</b><br>(n=296,496) | <b>TM-MA Switcher</b><br>(n=63,121) |
|----------------------------------|---------------------------------|-------------------------------------|
| <b>Part B Enrollment in 2020</b> | 281,793(95.0%)                  | 62,147 (98.5%)                      |
| <b>Part D Enrollment in 2020</b> | 211,609 (70.9%)                 | 52,964 (83.9%)                      |

**Notes.** TM = Traditional Medicare; MA = Medicare Advantage. TM Stayer indicates a beneficiary was enrolled only in TM in 2020 and 2021. TM-MA switcher indicates a beneficiary was enrolled in TM in 2020 and only MA in 2021 or who switched from MA to TM in 2020 and were continuously enrolled in 2021. Part B or Part D enrollment refers to at least one month of enrollment in 2020.
