# Supplementary material
Source: PubMed Central journal article supplement (PMC10015314)
Supplement: jama-e231426-s002.pdf [file jama-e231426-s002.pdf]

## Data Sharing Statement

Nguyen. Medicare Advantage Enrollment Among Beneficiaries With End-Stage Renal Disease in the First Year of the 21st Century Cures Act. *JAMA*. Published March 14, 2023.  
doi:10.1001/jama.2023.1426

### Data

**Data available:** No
